WITHDRAWN ARTICLE

**WITHDRAWN: MicroRNA-21 promotes progression of breast cancer via inhibition of mitogen-activated protein kinase10 (MAPK10)**

*Yilin Xie, Yaqing Liu, Xiaoyue Fan, Lan Zhang, Qing Li, Shenglei Li, Honglei Wang, Yi Xiao*

Bioscience Reports (2020), BSR20181000; **DOI:** 10.1042/BSR20181000

The Accepted Manuscript version of this article (published on 2 August 2019) was withdrawn on 19 May 2020 at the request of the authors.
